# Supplementary material for: Study Destination Choice and Career Preferences of International Students at China Pharmaceutical University
Source: MDPI journal article supplement (doi:10.3390/pharmacy10060149), 2022-11-10

## **SUPPLEMENTARY MATERIAL**

### **Study Destination Choice and Career Preferences of International Students in China Pharmaceutical University**

Raphael N. Alolga<sup>1\*</sup>, Said Abasse Kassim<sup>2</sup>, and Pierre Dramou<sup>3\*</sup>

<sup>1</sup> State Key Laboratory of Natural Medicines, School of Traditional Chinese Pharmacy, Department of Pharmacognosy, China Pharmaceutical University, Nanjing 210009, China

<sup>2</sup> Département de management, Faculté des sciences de l'administration, Université Laval, Québec, QC, Canada

<sup>3</sup> Department of Analytical Chemistry, School of Science, China Pharmaceutical University, Nanjing 210009, China

\* Correspondence: alolgara@cpu.edu.cn (RNA), pierred@cpu.edu.cn (PD); Tel.: 13776550643 (RNA), 13776662410 (PD).

## **QUESTIONNAIRE**

### **Factors that underpin Choice of Pharmacy Education in China and Career Path of Foreign Students**

**Objective:** This questionnaire seeks your input on the above topic. The questionnaire is so designed to capture all information required for the actualization of this topic. Names and other personal details of all participants are not required. **We respect the privacy of all participants and would therefore accordingly protect same. Completion and submission of the completed questionnaire is therefore deemed expression of your consent to participate in this study.** If there are any questions or comments concerning this topic, please contact Raphael N. Alolga, PhD (Dept of Pharmacognosy, CPU, email: [alolgara@cpu.edu.cn](mailto:alolgara@cpu.edu.cn)).

#### **Section A: Socio-demographic characteristics**

| <b>Gender</b>                                    | <b>Participant response</b> |
|--------------------------------------------------|-----------------------------|
| Male                                             |                             |
| Female                                           |                             |
| Neutral                                          |                             |
| <b>Age (year)</b>                                |                             |
| <= 20                                            |                             |
| 21-30                                            |                             |
| 31-40                                            |                             |
| Above 41                                         |                             |
| <b>Level of study</b>                            |                             |
| Doctorate                                        |                             |
| Master                                           |                             |
| Undergraduate                                    |                             |
| <b>Sources of funding</b>                        |                             |
| Self-funded                                      |                             |
| Scholarship from home country government/company |                             |
| Scholarship from Chinese government/university   |                             |

#### **Section B: Factors influencing choice to study in China.**

Rank the following in order of significance based on the Scale: *1= most important; 2= somewhat important; 3= not important*

| <b>Factor</b>                                       | <b>Participant response</b> |          |          |
|-----------------------------------------------------|-----------------------------|----------|----------|
|                                                     | <b>1</b>                    | <b>2</b> | <b>3</b> |
| The quality of university learning environment      |                             |          |          |
| The quality of academic staff                       |                             |          |          |
| Full or partial scholarship from Chinese government |                             |          |          |
| Wanting to obtain international qualification       |                             |          |          |
| Being able to learn Mandarin language               |                             |          |          |
| Cost of living (e.g., accommodation, food)          |                             |          |          |
| Personal safety and wellbeing                       |                             |          |          |
| Ranking of the university                           |                             |          |          |
| The growth of Chinese economy                       |                             |          |          |
| Learning Asian culture                              |                             |          |          |

|                                                         |  |  |  |
|---------------------------------------------------------|--|--|--|
| Trade agreements between my country and China           |  |  |  |
| Employment prospects in Asia or beyond                  |  |  |  |
| Ease of entry                                           |  |  |  |
| Easy to get study visa                                  |  |  |  |
| Being able to start business with Chinese counterpart   |  |  |  |
| Low cost of the degree                                  |  |  |  |
| Incentives for international students to study in China |  |  |  |
| My parents want me to study in China                    |  |  |  |
| Some of my friends are studying in China                |  |  |  |

### Section C: Reasons for not considering to study in Western university.

Rank the following in order of importance according to the Scale: *1= most important; 2= somewhat important; 3= not important.*

| Factor                                              | Participant response |   |   |
|-----------------------------------------------------|----------------------|---|---|
|                                                     | 1                    | 2 | 3 |
| Cost of degree is high                              |                      |   |   |
| Cost of living is high                              |                      |   |   |
| Difficult to get admissions in Western universities |                      |   |   |
| Hard to get student visa                            |                      |   |   |
| Worried about my safety and wellbeing               |                      |   |   |
| Far from my home country                            |                      |   |   |
| I may not integrate with Western cultures           |                      |   |   |
| I may feel isolated                                 |                      |   |   |

### Section D: Career domain preferred by students

Choose your best 3 options and Rank them in order of importance: *1= first choice; 2=second choice; 3= third choice.*

| What is your choice career domain after graduation? | Rank your response |
|-----------------------------------------------------|--------------------|
| Academia and research                               |                    |
| Clinical pharmacy                                   |                    |
| Community pharmacy                                  |                    |
| Drug quality control                                |                    |
| Drug regulatory bodies                              |                    |
| Hospital pharmacy                                   |                    |
| Medical representative                              |                    |
| Pharmaceutical Industry                             |                    |
| Public health                                       |                    |
| Working outside of home country                     |                    |
| Not working                                         |                    |
| Others:                                             |                    |

**Section E: Factors influencing future career domain choice**

Rank the following factors in order of importance according to the Scale: 1= *Strongly agree*; 2= *Agree*; 3= *Neutral*; 4= *Disagree*; 5= *Strongly disagree*.

| Factor                                                 | Participant response |   |   |   |   |
|--------------------------------------------------------|----------------------|---|---|---|---|
|                                                        | 1                    | 2 | 3 | 4 | 5 |
| <b>Faculty related influences</b>                      |                      |   |   |   |   |
| 1. Curriculum course/subject                           |                      |   |   |   |   |
| 2. Faculty extracurricular activities                  |                      |   |   |   |   |
| 3. Faculty member advise                               |                      |   |   |   |   |
| 4. Visit to a workplace (Pharmacy, industry, etc.)     |                      |   |   |   |   |
| 5. Training in a work place (Pharmacy, industry, etc.) |                      |   |   |   |   |
| <b>Personal related influences</b>                     |                      |   |   |   |   |
| 6. Family member/ relatives advise                     |                      |   |   |   |   |
| 7. A family member career choice                       |                      |   |   |   |   |
| 8. A friend's career choice                            |                      |   |   |   |   |
| 9. Good social status                                  |                      |   |   |   |   |
| 10. Interaction with practicing pharmacist             |                      |   |   |   |   |
| <b>Job related influences</b>                          |                      |   |   |   |   |
| 11. Opportunity for self-employment                    |                      |   |   |   |   |
| 12. Opportunity for part time work                     |                      |   |   |   |   |
| 13. Opportunity for promotion and advancement          |                      |   |   |   |   |
| 14. Opportunity for Health insurance                   |                      |   |   |   |   |
| 15. Job salary and incentives                          |                      |   |   |   |   |
| 16. Job allowances (Car, House)                        |                      |   |   |   |   |

**QR code of Questionnaire that was scanned by all participants using WeChat**

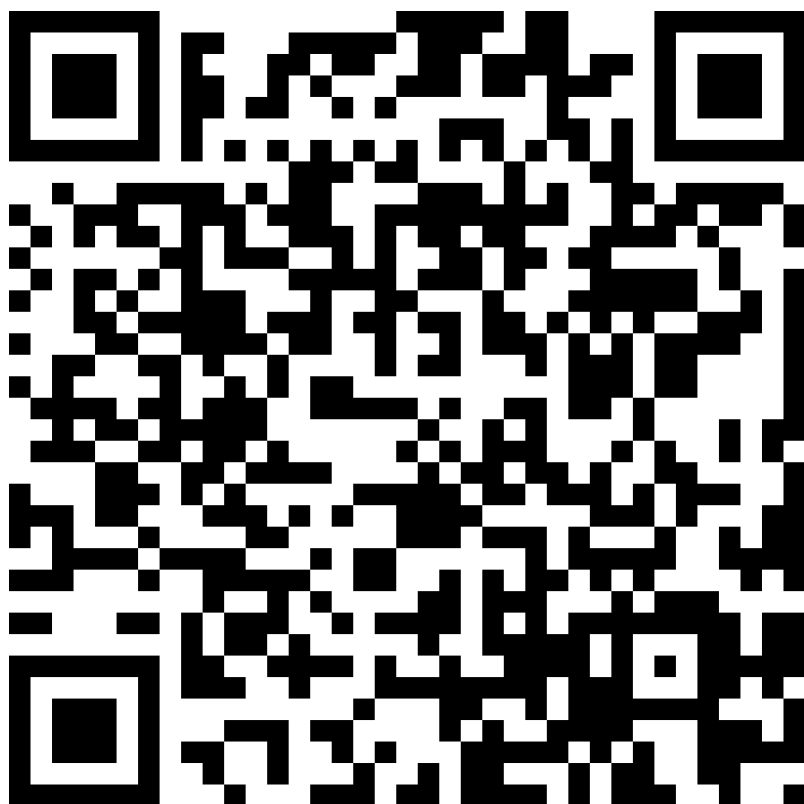

Supplement: s1 [file s1]
